# Supplementary material for: A microkinetic study of CO2 hydrogenation to methanol on Pd1–Cu(111) and Pd1–Ag(111) catalysts: a DFT analysis
Source: Royal Society of Chemistry journal article supplement (doi:10.1039/d4cp00070f), 2024-01-01
Supplement: d4cp00070f1.pdf [file d4cp00070f1.pdf]

## Supporting information

### Microkinetic Study of CO<sub>2</sub> Hydrogenation to Methanol on Pd<sub>1</sub>- Cu(111) and Pd<sub>1</sub>-Ag(111) Catalysts: A DFT Analysis

## 1. Transition states structure and frequency

Table S1: All imaginary frequencies of the corresponding transition states.

| No. | elementary reaction                                 | Cu(111)             | Pd <sub>1</sub> -Cu(111) | Pd <sub>1</sub> -Ag(111) |
|-----|-----------------------------------------------------|---------------------|--------------------------|--------------------------|
|     |                                                     | (cm <sup>-1</sup> ) | (cm <sup>-1</sup> )      | (cm <sup>-1</sup> )      |
| R2  | CO <sub>2</sub> * + * → CO* + O*                    | -346.25             | -323.69                  | -208.84                  |
| R3  | CO <sub>2</sub> * + H* → HCOO*                      | -643.44             | -596.55                  | -593.94                  |
| R4  | CO <sub>2</sub> * + H* → COOH*                      | -1,460.34           | -1,414.75                | -1,340.03                |
| R5  | HCOO* + H* → HCOOH*                                 | -754.28             | -293.50                  | -530.01                  |
| R6  | HCOO* + H* → H <sub>2</sub> COO*                    | -911.61             | -891.47                  | -657.23                  |
| R7  | COOH*+H* → COHOH*                                   | -1,154.49           | -1,258.58                | -1,140.37                |
| R8  | COOH* → CO* + OH*                                   | -267.14             | -286.92                  | -262.27                  |
| R9  | HCOOH*+H* → H <sub>2</sub> COOH*                    | -865.28             | -953.72                  | -913.24                  |
| R10 | HCOOH*+* → HCO*+OH*                                 | -277.06             | -221.66                  | -240.69                  |
| R11 | H <sub>2</sub> COO* + H* → H <sub>2</sub> COOH*     | -1,184.83           | -850.74                  | -773.08                  |
| R12 | H <sub>2</sub> COO* + * → CH <sub>2</sub> O* + O*   | -188.40             | -159.11                  | -169.66                  |
| R13 | H <sub>2</sub> COOH* + * → CH <sub>2</sub> O* + OH* | -72.67              | -111.27                  | -131.66                  |
| R14 | CO* + H* → HCO*                                     | -697.88             | -830.69                  | -869.32                  |
| R15 | CO* + H* → COH*                                     | -1,692.11           | -1,640.54                | -1,678.26                |
| R16 | COHOH* + * → COH* + OH*                             | -259.06             | -269.92                  | -283.85                  |
| R17 | COH* + H* → HCOH*                                   | -808.41             | -812.40                  | -817.16                  |
| R18 | HCO*+H* → CH <sub>2</sub> O*                        | -917.23             | -895.70                  | -828.33                  |
| R19 | HCOH* + H* → CH <sub>2</sub> OH*                    | -846.74             | -771.37                  | -826.45                  |
| R20 | CH <sub>2</sub> O* + H* → CH <sub>2</sub> OH*       | -1,379.61           | -1,231.59                | -1,166.35                |
| R21 | CH <sub>2</sub> O* + H* → CH <sub>3</sub> O*        | -317.43             | -872.86                  | -735.82                  |
| R22 | CH <sub>2</sub> OH* + H* → CH <sub>3</sub> OH*      | -934.69             | -889.68                  | -775.28                  |
| R23 | CH <sub>3</sub> O* + H* → CH <sub>3</sub> OH*       | -1,184.10           | -929.72                  | -224.81                  |

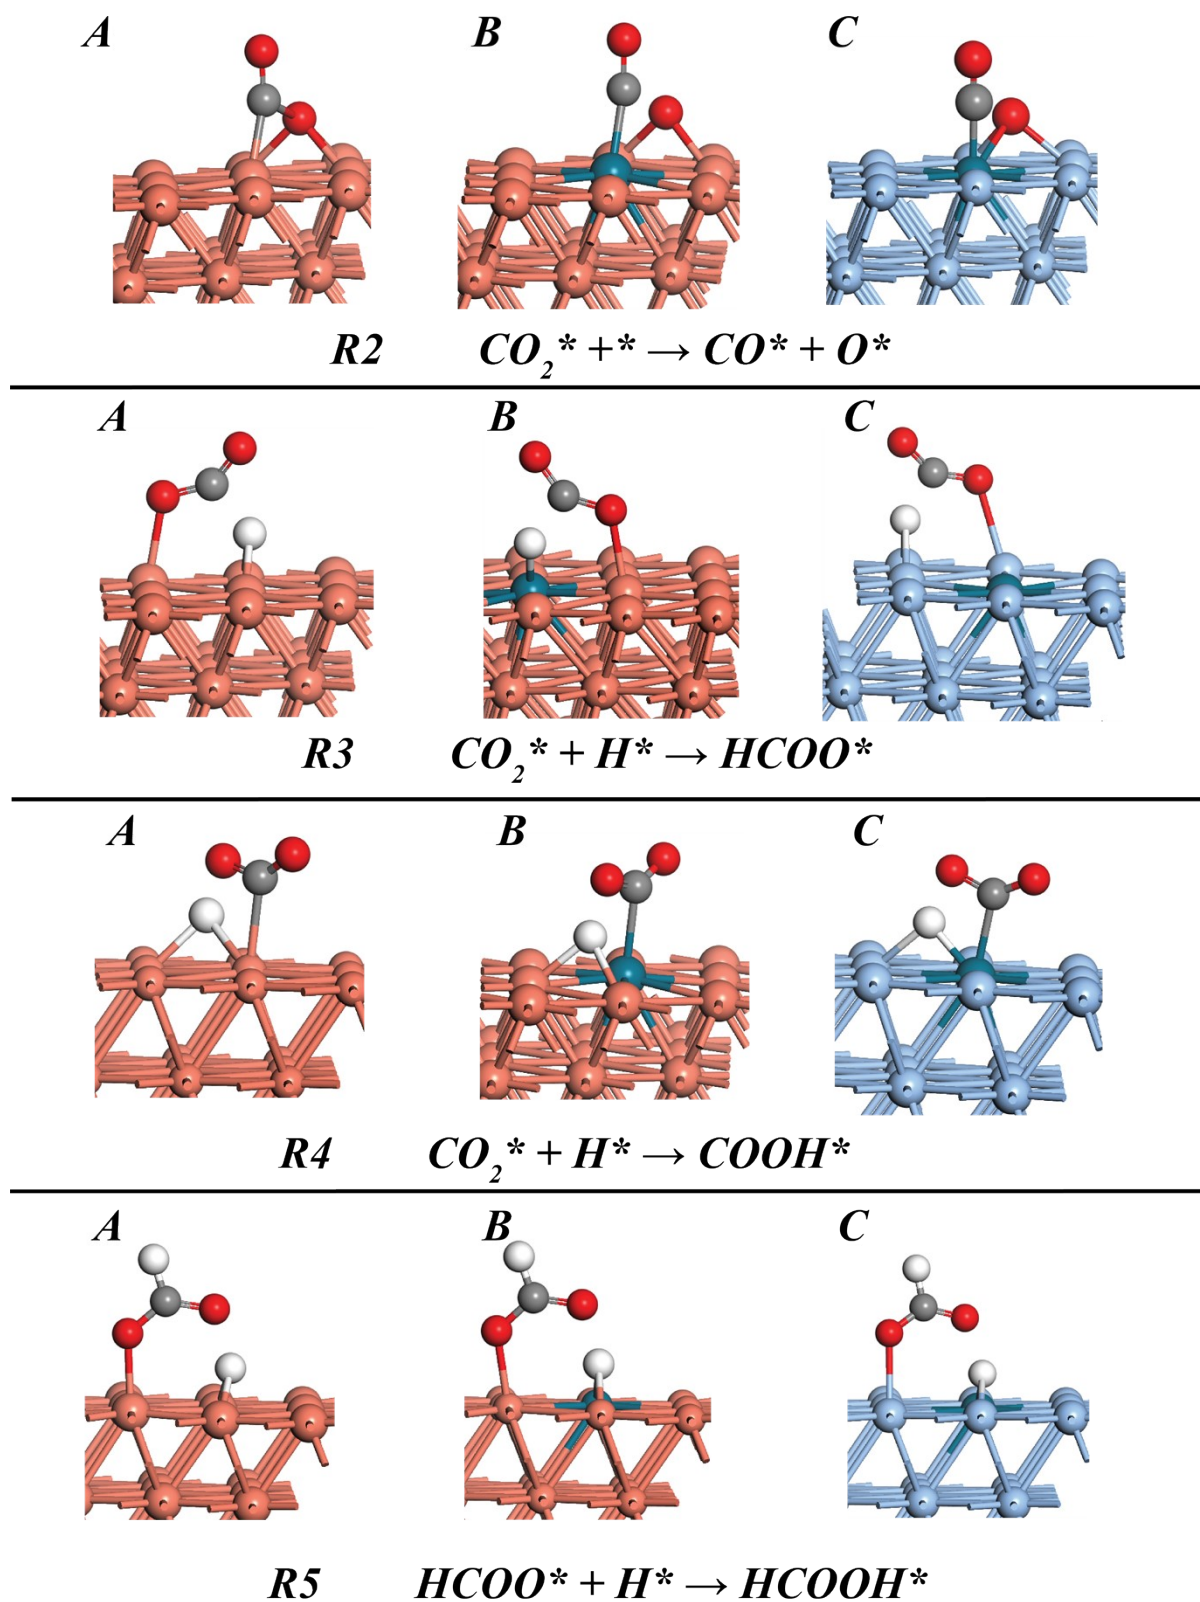

**Figure S1:** Transition state structure for reaction step (A = Cu(111) surface, B = Pd<sub>1</sub>-Cu(111) surface, C = Pd<sub>1</sub>-Ag(111) surface).

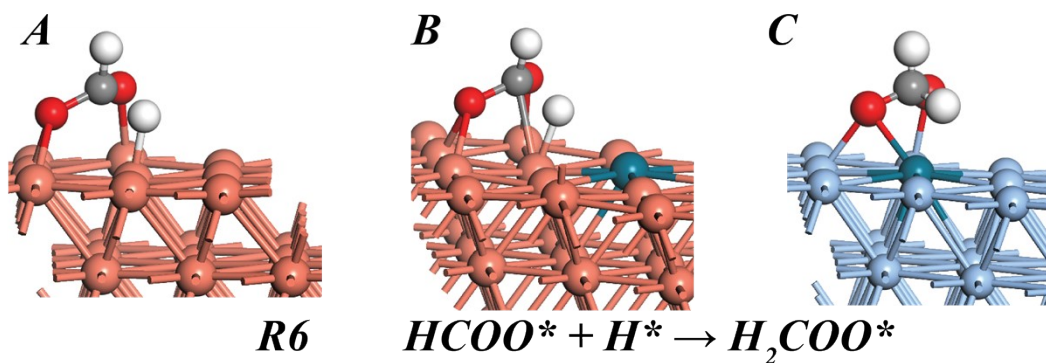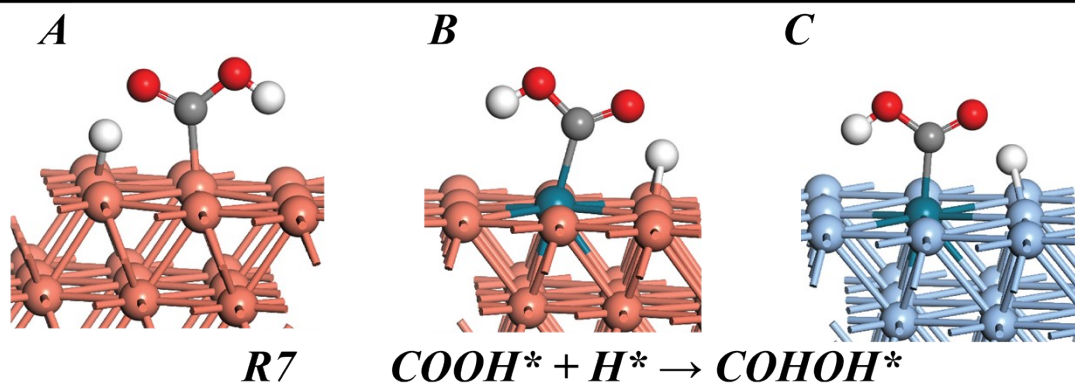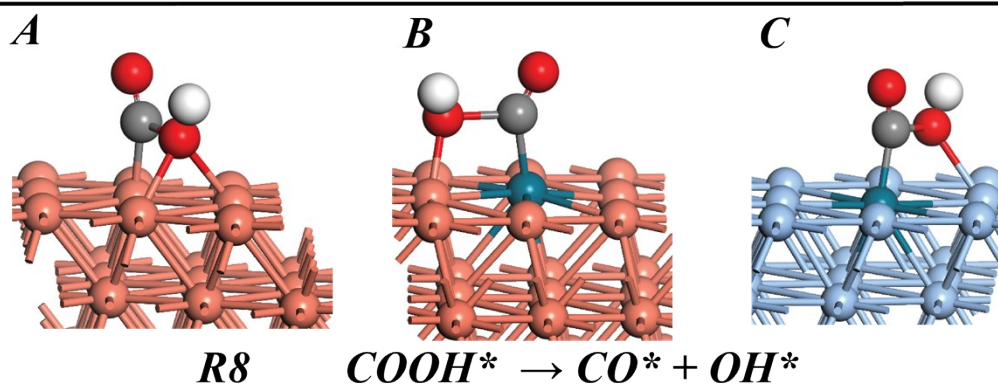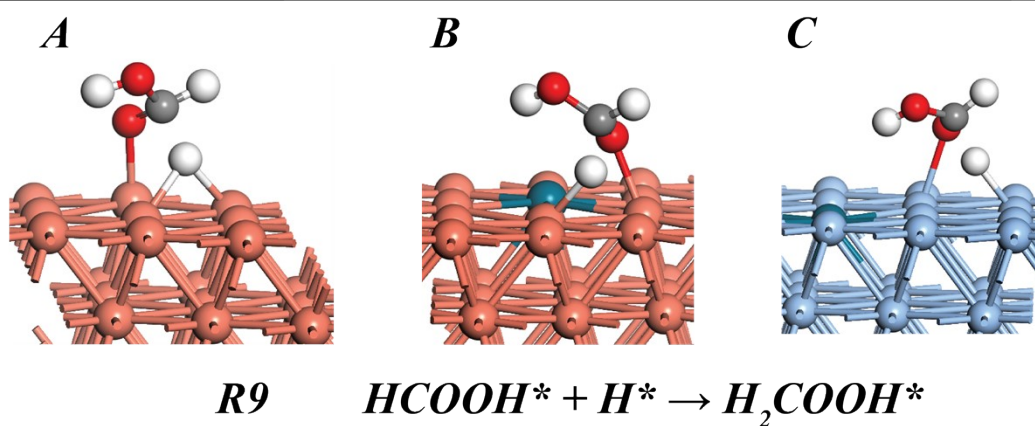

Figure S1 cont'd

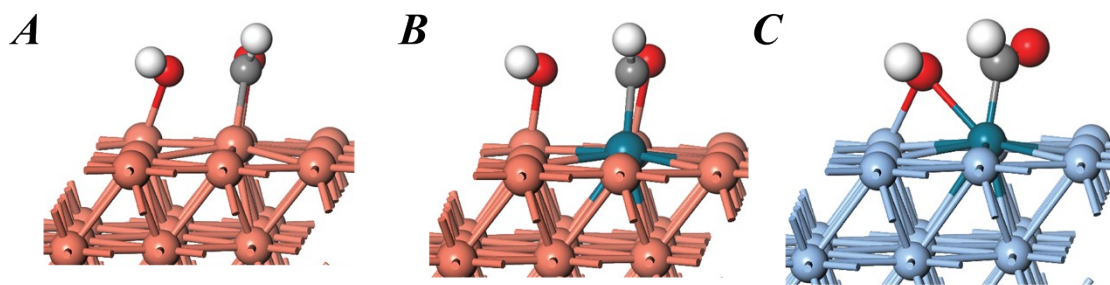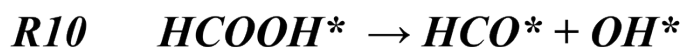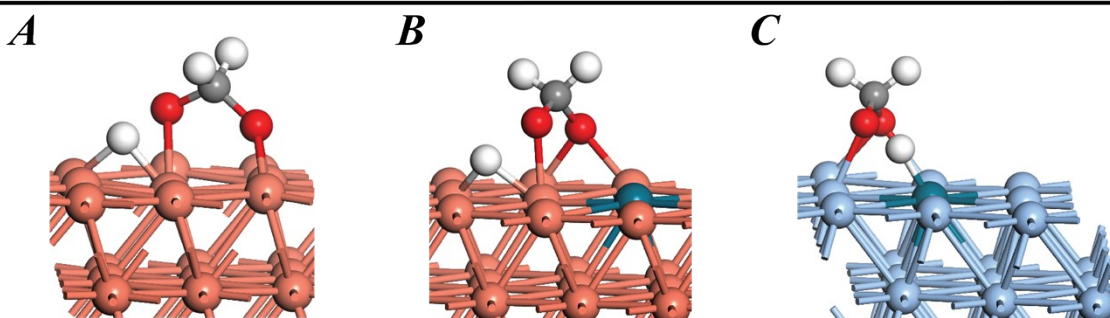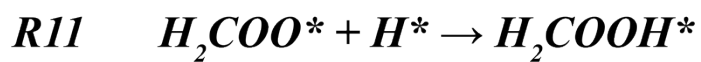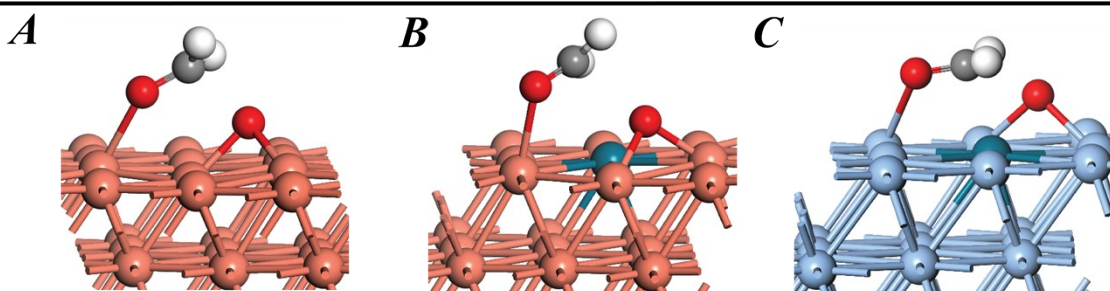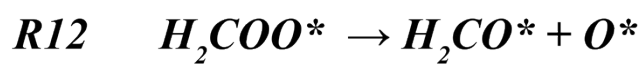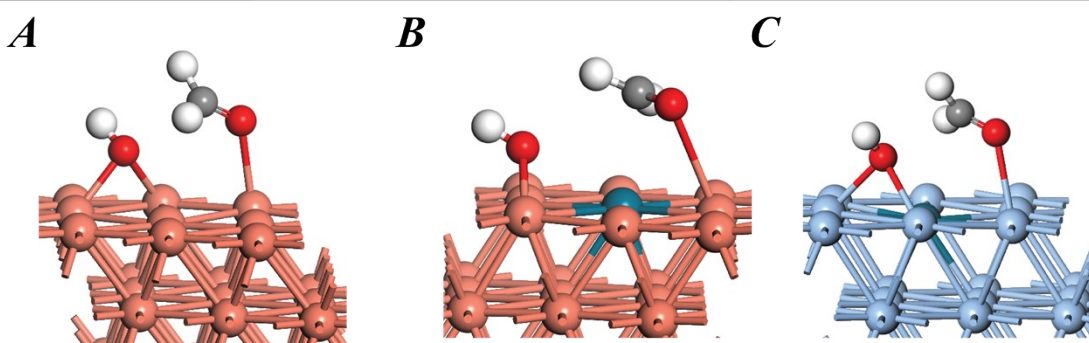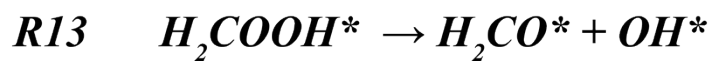

Figure S1 cont'd

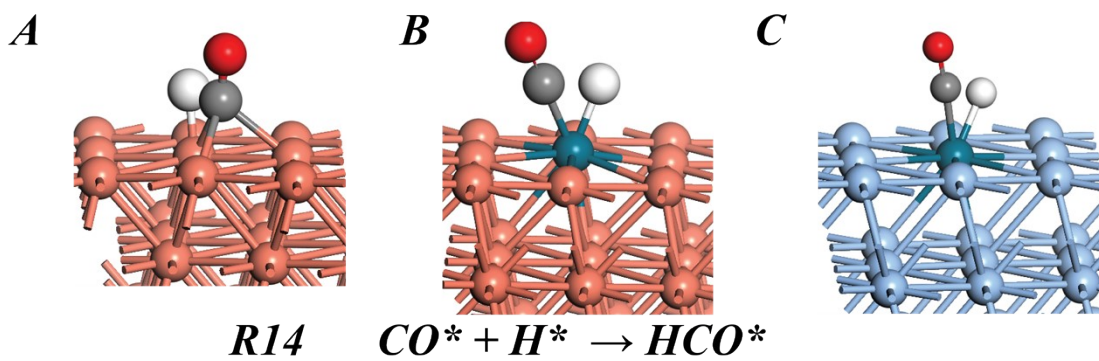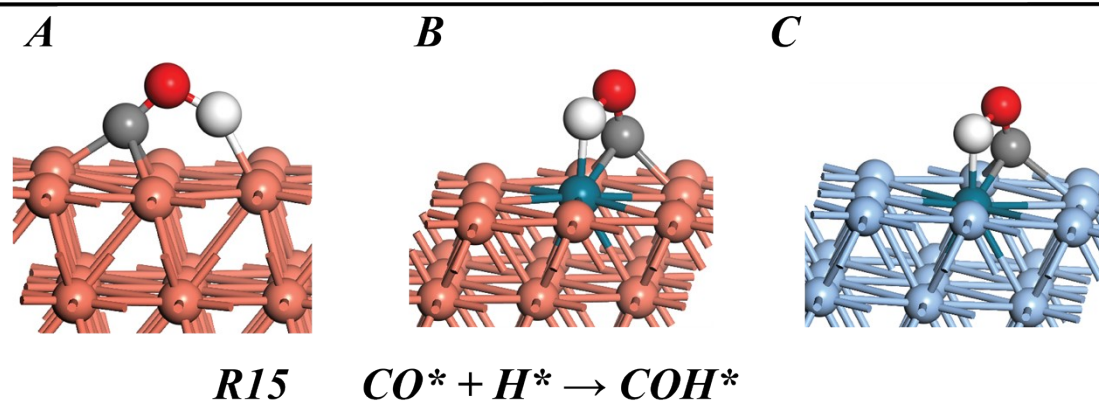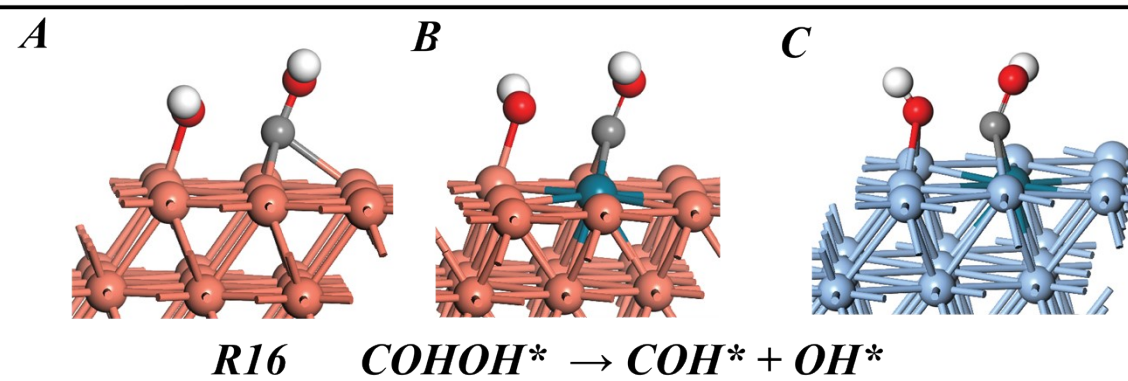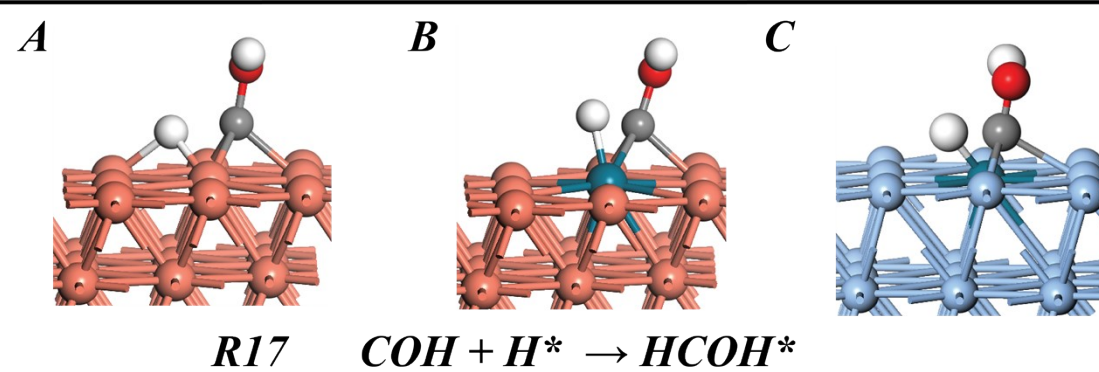

Figure S1 cont'd

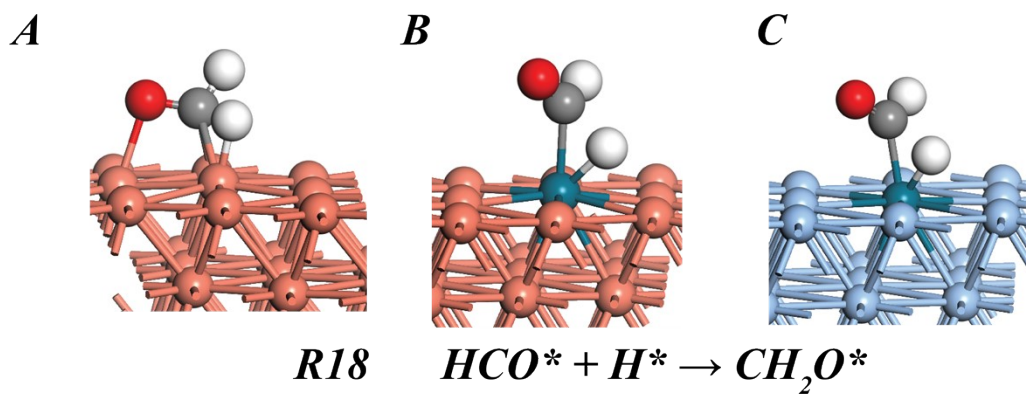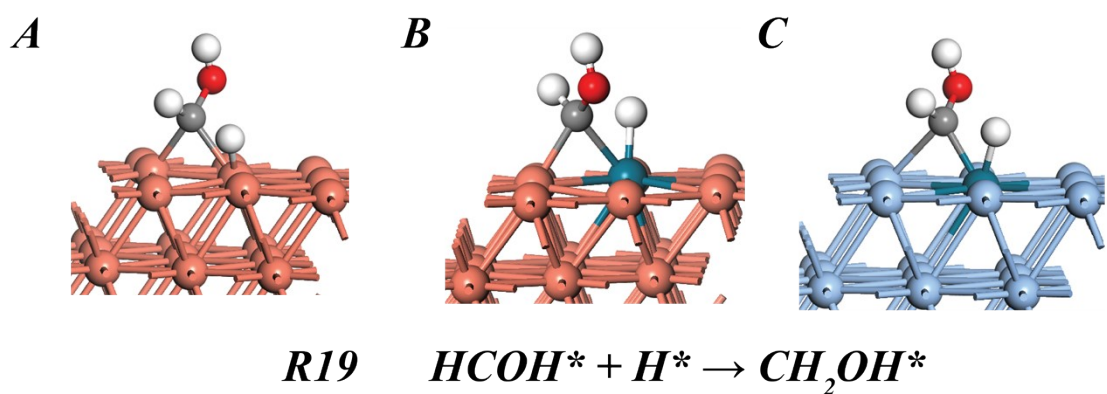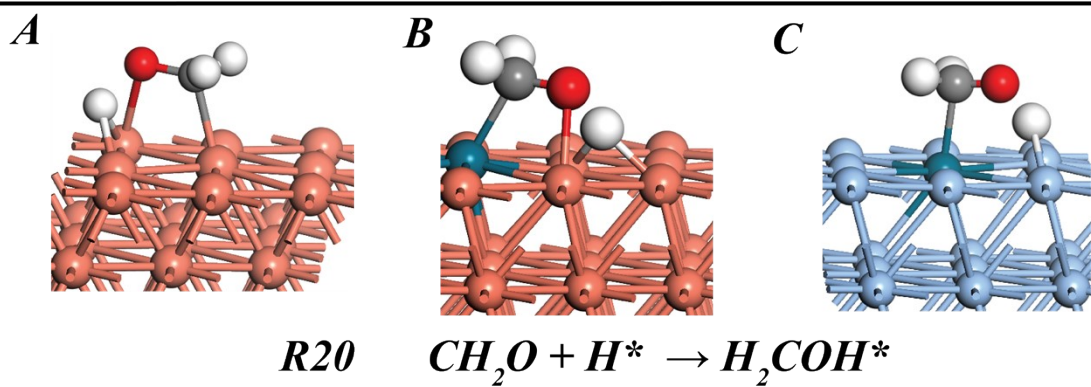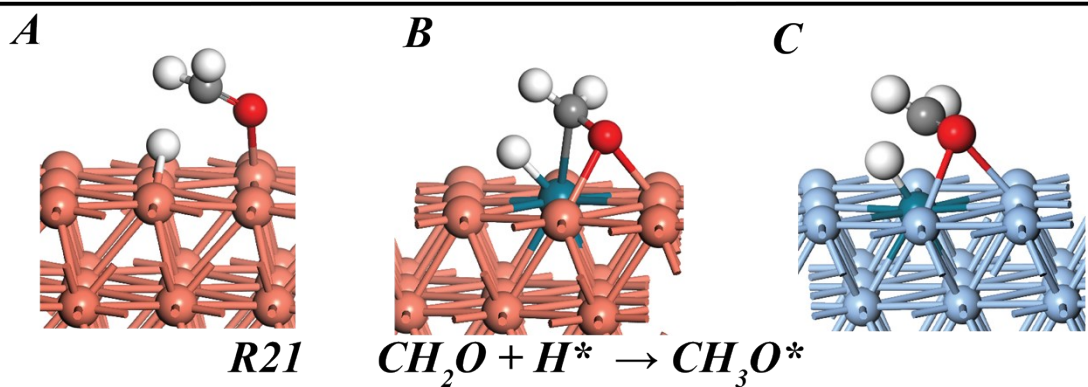

Figure S1 cont'd

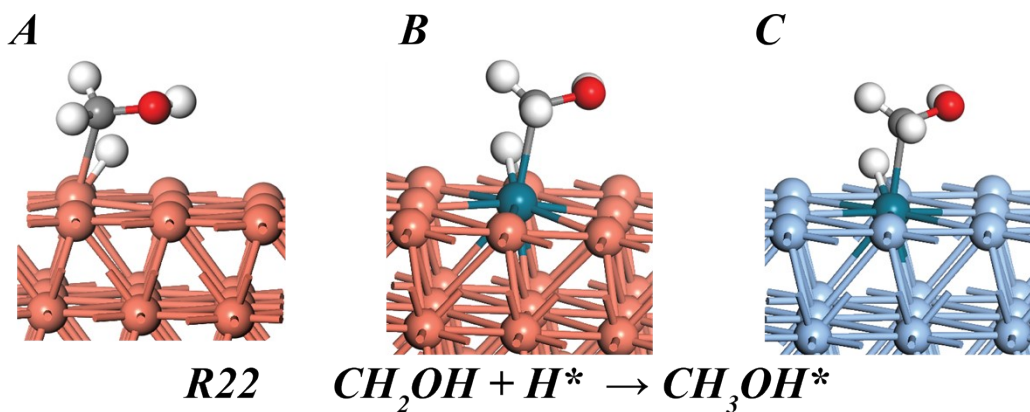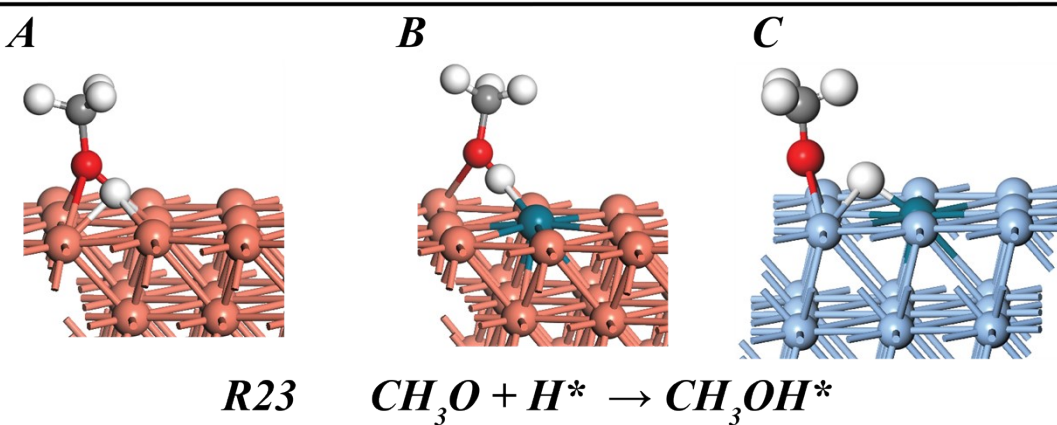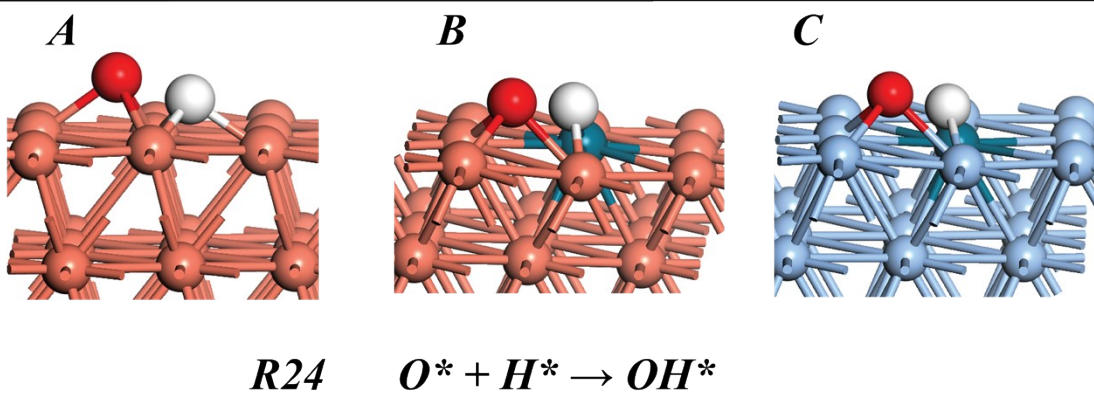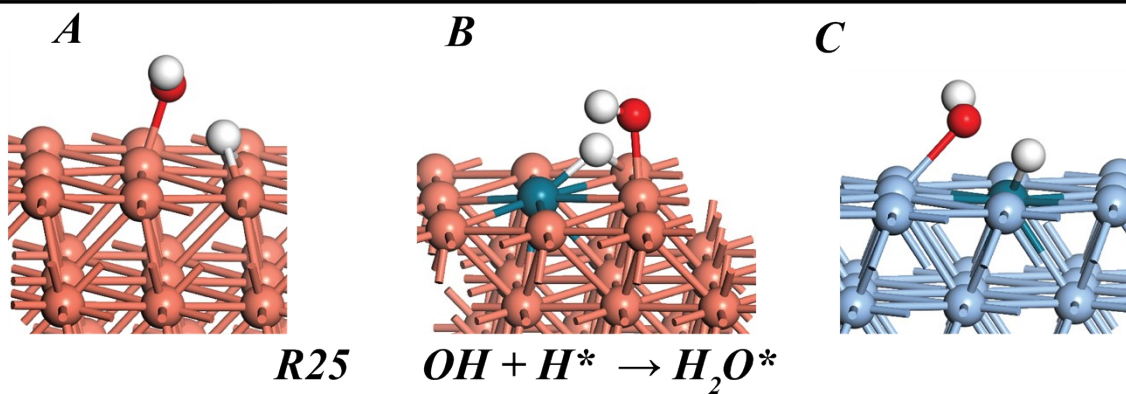

Figure S1 cont'd



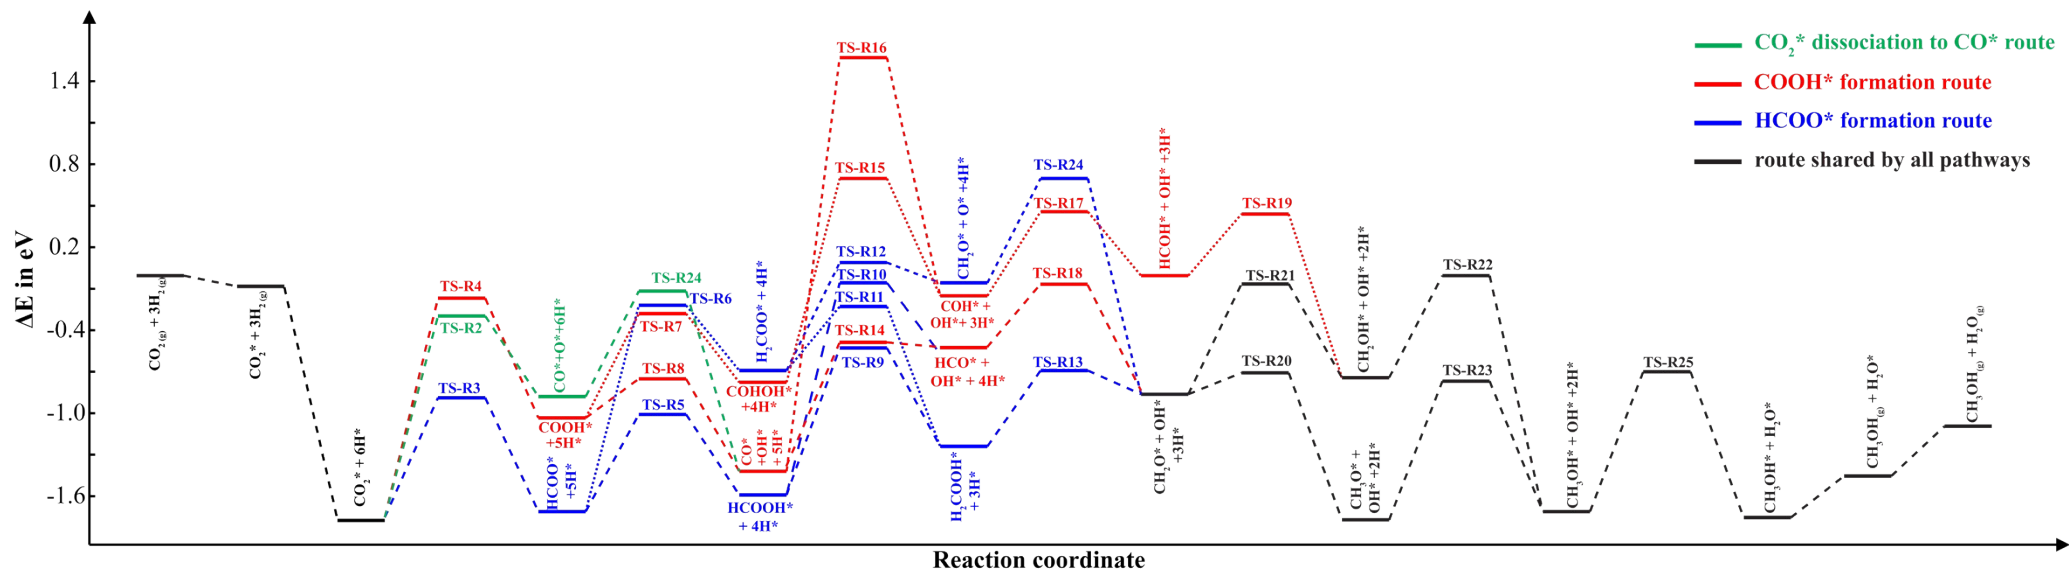

Figure S2: The energy profile diagram depicting possible reaction paths of CO<sub>2</sub> hydrogenation to CH<sub>3</sub>OH on the Cu(111) surface

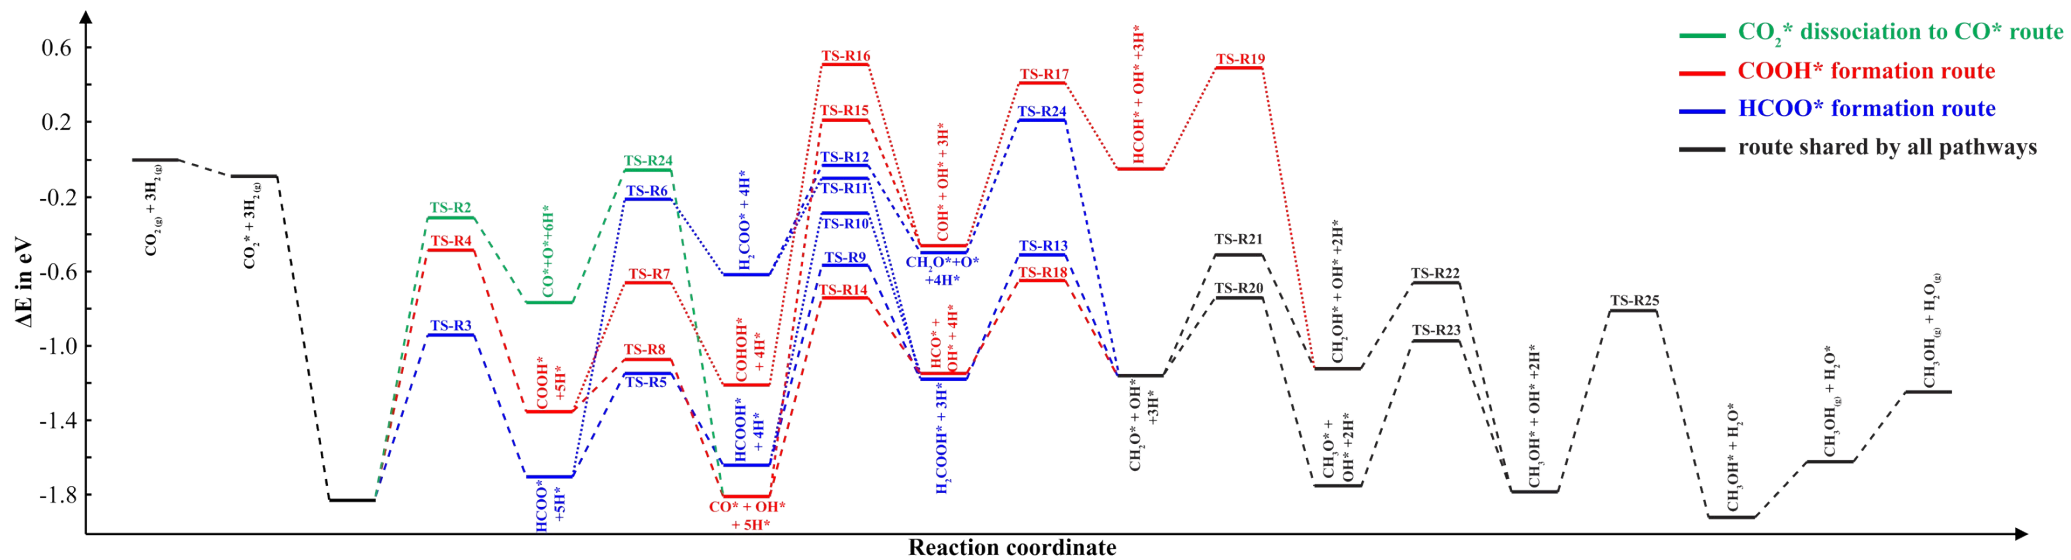

Figure S3: The energy profile diagram depicting possible reaction paths of CO<sub>2</sub> hydrogenation to CH<sub>3</sub>OH on the Pd<sub>1</sub>-Cu(111) SAA surface.

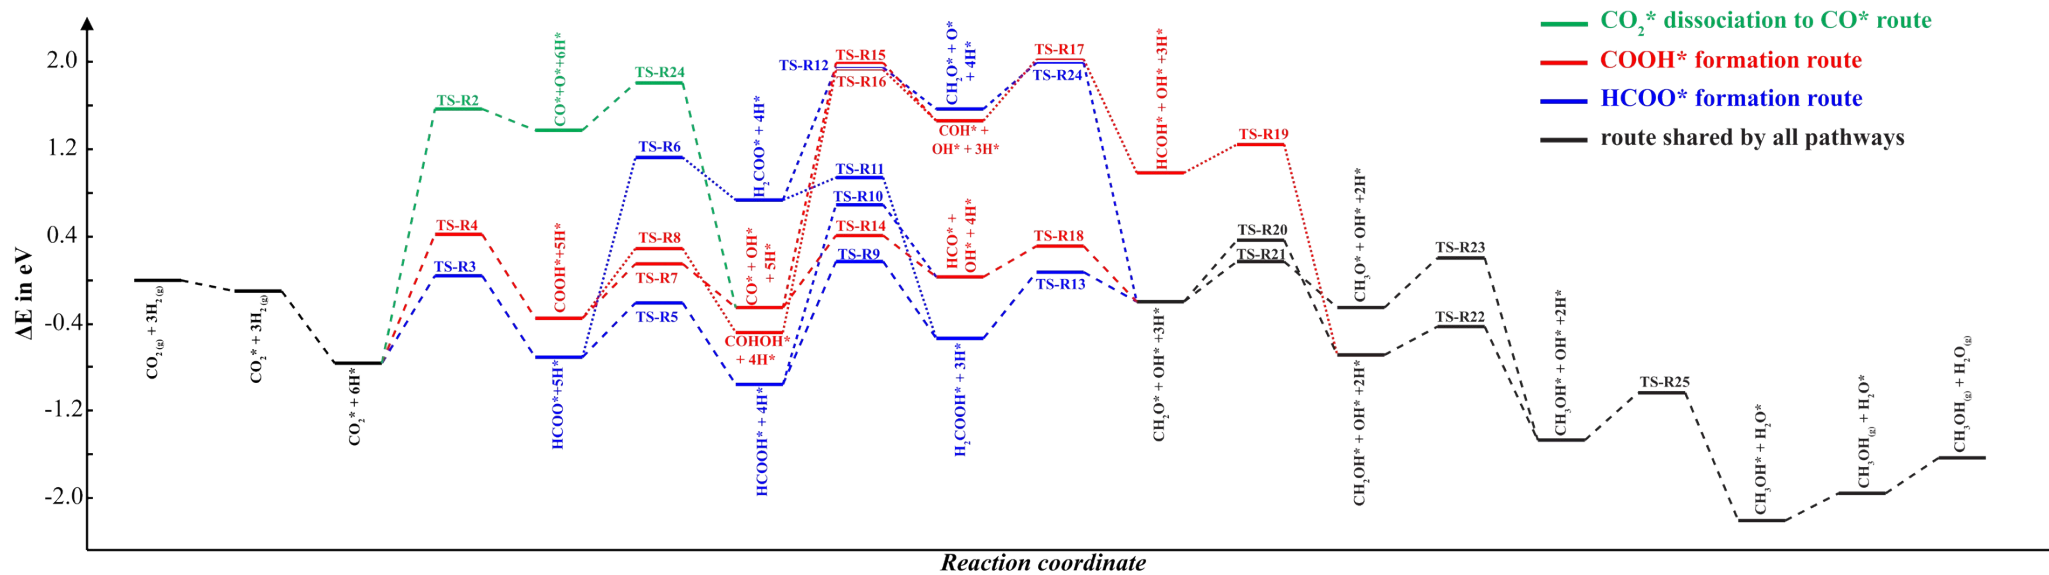

Figure S4: The energy profile diagram depicting possible reaction paths of  $\text{CO}_2$  hydrogenation to  $\text{CH}_3\text{OH}$  on the  $\text{Pd}_1\text{-Ag}(111)$  SAA surface.
